# Supplementary material
Source: Research Square preprint supplement (doi:10.21203/rs.3.rs-8197895/v1)
Supplement: Supplementary file 1 [file 3ab1ea8a5b697fec7d593b02.docx]

**แบบสอบถามสำหรับการวิจัย**

**เรื่อง การพัฒนาโปรแกรมเสริมสร้างแกนนำทางด้านสุขภาพวัยรุ่นและการส่งต่อด้วยแอพพิเคชั่นในนักเรียนชาวไทยภูเขาสำหรับมัธยมศึกษาต้นในจังหวัดเชียงราย**

**เครื่องมือชิ้นที่ 1 (สำหรับนักเรียนชาวไทยภูเขามัธยมศึกษาต้น)**

...............................................................**....................................................................................................**

**ด้านสุขภาพใจ** ประกอบไปด้วย 10 ส่วน

ส่วนที่ 1 แบบสอบถามข้อมูลส่วนบุคคลและข้อมูลการใช้สารเสพติด

ส่วนที่ 2 แบบประเมินความรู้เกี่ยวกับการตั้งครรภ์ไม่พร้อมและโรคติดเชื้อทางเพศสัมพันธ์

ส่วนที่ 3 แบบประเมินทัศนคติเกี่ยวกับการตั้งครรภ์ไม่พร้อมและโรคติดเชื้อทางเพศสัมพันธ์

ส่วนที่ 4 ปัจจัยระหว่างบุคคล ได้แก่ การคบเพื่อน สัมพันธภาพครอบครัว บทบาทของครู

ส่วนที่ 5 ปัจจัยระดับสถาบันได้แก่ นโยบายโรงเรียน

ส่วนที่ 6 ความรอบรู้สุขภาพทางเพศ

**ด้านสุขภาพใจ**

**ส่วนที่ 1** **แบบสอบถามข้อมูลส่วนบุคคล**

**คำชี้แจง** ให้ทำเครื่องหมาย “✓” หน้าข้อความและเติมข้อความที่ตรงตามความเป็นจริงของนักเรียนมากที่สุด

1. อายุ ……………………... ปี

2. เพศ □ ชาย □ หญิง

3. ชนชาติพันธุ์

□ อาข่า □ ลาหู่ □ ม้ง □ เย้า □ กะเหรี่ยง □ ลีซู

4. นักเรียนมีบัตรประชาชนไทย 13 หลัก

□ มี □ ไม่มี □ บัตรอื่น (ระบุ) ………

5. ศาสนา

□ พุทธ □ คริสต์ □ อิสลาม □ นับถือบรรพบุรุษ □ อื่นๆ(ระบุ) ………

6. นักเรียนศึกษาอยู่ชั้น □ มัธยมศึกษา 1 □ มัธยมศึกษา2 □ มัธยมศึกษา 3

7. ลักษณะของโรงเรียน

□ ไปกลับ □ประจำ

8. ลักษณะครอบครัวของนักเรียน (เลือกคำตอบเดียว)

□ บิดา มารดาอยู่ด้วยกัน □บิดา มารดา แยกกันอยู่ แต่ไม่ได้สมรสใหม่(หย่าร้าง)

□ บิดา หรือมารดา สมรสใหม่ □ครอบครัวอุปถัมภ์

□บิดา หรือมารดา เสียชีวิต

9.ประวัติการใช้สารเสพติดของนักเรียน มีการปฏิบัติมากน้อยเพียงใด

| ประวัติการใช้สารเสพติด | ไม่เคยปฏิบัติเลย | เคย แต่เลิกแล้ว (อย่างน้อย 6 เดือน) | ปฏิบัติบางครั้ง (1-2 ครั้ง/สัปดาห์) | ปฏิบัติบ่อยครั้ง (3-4 ครั้ง/สัปดาห์) | ปฏิบัติเป็นประจำทุกวัน |
| --- | --- | --- | --- | --- | --- |
| สูบบุหรี่/บุหรี่ไฟฟ้า |  |  |  |  |  |
| เครื่องดื่มแอลกอฮอล์ เช่น เหล้า เบียร์ |  |  |  |  |  |
| กัญชา |  |  |  |  |  |
| ยาบ้า/ยาไอซ์/ยาอี |  |  |  |  |  |
| กระท่อม |  |  |  |  |  |
| อื่นๆ ระบุ......................................... |  |  |  |  |  |

**ด้านร่างกาย**

**ส่วนที่ 2 แบบประเมินความรู้เกี่ยวกับการตั้งครรภ์ไม่พร้อมและโรคติดเชื้อทางเพศสัมพันธ์และวิธีป้องกัน**

**คำชี้แจง** ทำเครื่องหมาย “✓” ในช่องที่ตรงกับคำตอบของนักเรียนมากที่สุด เพียงข้อเดียว

| **ข้อคำถาม** | **ใช่** | **ไม่ใช่** |
| --- | --- | --- |
| 1. ผู้ที่เสี่ยงต่อการติดเชื้อโรคติดต่อทางเพศสัมพันธ์ คือ คนทุกเพศทุกวัยที่มีพฤติกรรมเสี่ยงทางเพศ |  |  |
| 2. การมีคู่นอนมากกว่า 1 คนใน 3 เดือนที่ผ่านมาเสี่ยงต่อการติดเชื้อโรคติดต่อทางเพศสัมพันธ์ |  |  |
| 3. โรคติดต่อทางเพศสัมพันธ์ เช่น เอดส์ / ซิฟิลิส สามารถติดต่อไปยังทารกในครรภ์ได้ |  |  |
| 4. การมีเพศสัมพันธ์กับเพื่อนสนิทไม่ทำให้ติดเชื้อโรคติดต่อทางเพศสัมพันธ์ |  |  |
| 5. ผู้ที่เป็นโรคติดต่อทางเพศสัมพันธ์ถึงไม่แสดงอาการของโรคแต่สามารถแพร่เชื้อไปสู่ผู้อื่นได้ถ้ามีการร่วมเพศโดยไม่ใช้ถุงยางอนามัย |  |  |
| 6. การมีเพศสัมพันธ์แบบหลั่งภายนอกไม่ทำให้ติดเชื้อโรคติดต่อทางเพศสัมพันธ์ |  |  |
| 7. อาการปัสสาวะแสบขัดและมีหนองไหลออกจากท่อปัสสาวะคืออาการของโรคหนองในแท้ |  |  |
| 8. การสวมถุงยางอนามัยควรสวมเมื่ออวัยวะเพศชายเริ่มจะแข็งตัวเท่านั้น |  |  |
| 9. การใช้ถุงยางอนามัยก่อนการมีเพศสัมพันธ์สามารถป้องกันโรคติดต่อทางเพศสัมพันธ์ได้ 100 % |  |  |
| 10. เมื่อมีพฤติกรรมเสี่ยงทางเพศหรือสงสัยว่าติดเชื้อโรคติดต่อทางเพศสัมพันธ์  ควรรีบพบแพทย์เพื่อทำการตรวจหรือรักษาทันที |  |  |

**ส่วนที่ 3 ทัศนคติเกี่ยวกับเพศสัมพันธ์และวิธีป้องกัน**

**คำชี้แจง** ทำเครื่องหมาย “✓” ในช่องที่ตรงกับคำตอบของนักเรียนมากที่สุด

เห็นด้วยอย่างยิ่ง ให้ 5 คะแนน เห็นด้วย ให้ 4 คะแนน ไม่แน่ใจ ให้ 3 คะแนน

ไม่เห็นด้วย ให้ 2 คะแนน ไม่เห็นด้วยอย่างยิ่ง ให้ 1 คะแนน

| **ข้อคำถาม** | **ความคิดเห็น** | | | | |
| --- | --- | --- | --- | --- | --- |
| **ไม่เห็นด้วยอย่างยิ่ง** | **ไม่เห็นด้วย** | **ไม่แน่ใจ** | **เห็นด้วย** | **เห็นด้วยอย่างยิ่ง** |
| 1. วัยรุ่นมีความเสี่ยงต่อโรคติดต่อทางเพศสัมพันธ์ |  |  |  |  |  |
| 2.การเปลี่ยนคู่นอนหลายคนในวัยรุ่นชายเป็นสิ่งที่น่าภูมิใจ |  |  |  |  |  |
| 3. การมีเพศสัมพันธ์โดยใช้ปาก (Oral Sex) เป็นวิธีการป้องกันโรคติดต่อทางเพศสัมพันธ์ |  |  |  |  |  |
| 4. การมีแฟนหลายคนจะดูเท่ในกลุ่มเพื่อน |  |  |  |  |  |
| 5. การหาคู่จากแอพพลิเคชั่นออนไลน์เสี่ยงต่อการเกิดโรคติดต่อทาง  เพศสัมพันธ์ |  |  |  |  |  |
| 6.การเลือกสำเร็จความใคร่ด้วยตัวเองเป็นการป้องกันโรคติดต่อทาง  เพศสัมพันธ์ |  |  |  |  |  |
| 7.การกินยาคุมกำเนิดฉุกเฉินสามารถช่วยป้องกันการเกิดโรคติดต่อทางเพศสัมพันธ์ |  |  |  |  |  |
| 8.การมีเพศสัมพันธ์กับแฟนเป็นการพิสูจน์รักแท้ |  |  |  |  |  |
| 9.การมีเพศสัมพันธ์แบบไม่สวมถุงยางอนามัยแสดงถึงความรักที่  แท้จริง |  |  |  |  |  |
| 10โรคติดต่อทางเพศสัมพันธ์สามารถก่อให้เกิดการตีตราทางสังคมและการเลือกปฏิบัติ |  |  |  |  |  |

**ส่วนที่ 4 ปัจจัยระหว่างบุคคล ได้แก่ การคบเพื่อน สัมพันธภาพครอบครัว บทบาทของครู**

**4.1 การคบเพื่อน**

**คำชี้แจง** โปรดอ่านข้อความแต่ละข้ออย่างละเอียดแล้วทำเครื่องหมาย ✓ ลงในช่องว่างที่กำหนดให้ตรงกับระดับการปฏิบัติตามการพิจารณาของท่านเพียงช่องเดียว

เป็นประจำ ให้ 5 คะแนน บ่อยครั้ง ให้ 4 คะแนน นานๆ ครั้ง ให้ 3 คะแนน

บางครั้ง ให้ 2 คะแนน ไม่เคยเลย ให้ 1 คะแนน

| **การคบเพื่อน (บทบาทเพื่อนที่มีอิทธิพลต่อพฤติกรรมการป้องกัน)** | **คะแนน** | | | | |
| --- | --- | --- | --- | --- | --- |
| **1** | **2** | **3** | **4** | **5** |
| 1.เมื่อท่านมีปัญหาทางเพศจะเลือกปรึกษาเพื่อนเป็นลำดับแรกทุกครั้ง |  |  |  |  |  |
| 2.ท่านพูดคุยกับเพื่อนเรื่องโรคติดต่อทางเพศสัมพันธ์และวิธีป้องกัน |  |  |  |  |  |
| 3. ท่านให้คำปรึกษาเรื่องโรคติดต่อทางเพศสัมพันธ์และวิธีป้องกันแก่เพื่อน |  |  |  |  |  |
| 4. ท่านจะตักเตือนเมื่อพบว่าเพื่อนในกลุ่มมีพฤติกรรมเสี่ยงทางเพศ |  |  |  |  |  |
| 5. ท่านและเพื่อนจะหากิจกรรมท าเพื่อเบี่ยงเบนความสนใจเรื่องเพศ |  |  |  |  |  |

**4.2 สัมพันธภาพครอบครัว**

| **สัมพันธภาพครอบครัว** | **คะแนน** | | | | |
| --- | --- | --- | --- | --- | --- |
| **1** | **2** | **3** | **4** | **5** |
| 1.เมื่อท่านมีแฟนจะบอกให้พ่อ แม่ทราบทุกครั้ง |  |  |  |  |  |
| 2.ถ้าท่านมีปัญหาเรื่องเพศจะปรึกษา พ่อ แม่ เป็นอันดับแรก |  |  |  |  |  |
| 3. เมื่อท่านสอบถามเรื่องเพศกับพ่อ แม่จะได้รับคำแนะนำที่ดีเสมอ |  |  |  |  |  |
| 4. พ่อแม่เป็นแบบอย่างที่ดีของการแสดงบทบาททางเพศ |  |  |  |  |  |
| 5. เมื่อท่านดูรายการโทรทัศน์และมีการแสดงทางเพศที่ไม่เหมาะสม  พ่อแม่จะคอยแนะนำเสมอ |  |  |  |  |  |

**4.3 บทบาทของครู**

| **บทบาทของครู** | **คะแนน** | | | | |
| --- | --- | --- | --- | --- | --- |
| **1** | **2** | **3** | **4** | **5** |
| 1.ครูของท่านได้ทำการสอนเรื่องโรคติดต่อทางเพศสัมพันธ์และวิธีป้องกัน |  |  |  |  |  |
| 2.ครูของท่านมีการใช้สื่อหรืออุปกรณ์การสอนเรื่องโรคติดต่อทางเพศสัมพันธ์และวิธีป้องกันเพื่อให้เข้าใจได้ง่าย |  |  |  |  |  |
| 3. ครูมีการสอนทักษะการปฏิบัติตนที่เหมาะสมต่อเพศตรงข้าม |  |  |  |  |  |
| 4. เมื่อท่านปรึกษาครูเรื่องโรคติดต่อทางเพศสัมพันธ์และวิธีป้องกัน  ท่านจะได้รับคำอธิบายด้วยท่าทางที่เต็มใจ |  |  |  |  |  |
| 5. เมื่อท่านหรือเพื่อนมีปัญหาเรื่องเพศครูจะรีบเข้าช่วยเหลือเสมอ |  |  |  |  |  |

**ส่วนที่ 5 ปัจจัยระดับสถาบันได้แก่ นโยบายโรงเรียน**

**คำชี้แจง** โปรดอ่านข้อความแต่ละข้ออย่างละเอียดแล้วทำเครื่องหมาย ✓ ลงในช่องว่างที่กำหนดให้ตรงกับระดับการปฏิบัติตามการพิจารณาของท่านเพียงช่องเดียว

เป็นประจำ ให้ 5 คะแนน บ่อยครั้ง ให้ 4 คะแนน นานๆ ครั้ง ให้ 3 คะแนน

บางครั้ง ให้ 2 คะแนน ไม่เคยเลย ให้ 1 คะแนน

| **นโยบายโรงเรียน** | **คะแนน** | | | | |
| --- | --- | --- | --- | --- | --- |
| **1** | **2** | **3** | **4** | **5** |
| 1.โรงเรียนของท่านมีนโยบายส่งเสริมความรู้เรื่องโรคโรคติดต่อทางเพศสัมพันธ์และวิธีป้องกัน |  |  |  |  |  |
| 2.โรงเรียนของท่านตรวจตราป้องกันการมีพฤติกรรมเสี่ยงทางเพศของนักเรียน |  |  |  |  |  |
| 3. โรงเรียนของท่านสอนเกี่ยวกับโรคติดต่อทางเพศสัมพันธ์และวิธีป้องกัน |  |  |  |  |  |
| 4. โรงเรียนของนักเรียนมีการจัดสื่อ/นิทรรศการ/บอร์ดความรู้เรื่องโรคติดต่อทางเพศสัมพันธ์และวิธีป้องกัน |  |  |  |  |  |
| 5. โรงเรียนของท่านจัดให้มีการอบรมความรู้เรื่องโรคติดต่อทางเพศสัมพันธ์และวิธีการป้องกันจากหน่วยงานภายนอก |  |  |  |  |  |

**ส่วนที่ 6 ความรอบรู้สุขภาพทางเพศ**

**คำชี้แจง** โปรดอ่านข้อความแต่ละข้ออย่างละเอียดแล้วทำเครื่องหมาย ✓ ลงในช่องว่างที่กำหนดให้ตรงกับระดับการปฏิบัติตามการพิจารณาของท่านเพียงช่องเดียว

ทำได้ง่ายมาก ให้ 5 คะแนน ทำได้ค่อนข้างง่าย ให้ 4 คะแนน

ทำได้ค่อนข้างยาก ให้ 3 คะแนน ทำได้ยากมาก ให้ 2 คะแนน

ทำไม่ได้เลย ให้ 1 คะแนน

| **ความสามารถและทักษะในการเข้าถึงข้อมูล**  **เรื่องโรคติดต่อทางเพศสัมพันธ์และวิธีป้องกัน** | **คะแนน** | | | | |
| --- | --- | --- | --- | --- | --- |
| **1** | **2** | **3** | **4** | **5** |
| 1.ท่านสามารถค้นหาข้อมูลเรื่องโรคติดต่อทางเพศสัมพันธ์และวิธีการป้องกัน ได้จากสื่อต่าง ๆ ด้วยตนเอง |  |  |  |  |  |
| 2.เมื่อท่านได้หาข้อมูลเรื่องโรคติดต่อทางเพศสัมพันธ์และวิธีป้องกันท่านสามารถพิจารณาความน่าเชื่อถือของข้อมูลจากชื่อหน่วยงาน หรือ ผู้เขียนที่ได้การยอมรับ |  |  |  |  |  |
| 3. เมื่อท่านได้หาข้อมูลเรื่องโรคติดต่อทางเพศสัมพันธ์และวิธีป้องกัน ท่านสามารถพิจารณาความทันสมัยของข้อมูลนั้น ๆ โดยดู วัน เดือน ปี ที่ระบุ ทุกครั้ง |  |  |  |  |  |
| 4. ท่านสามารถตรวจสอบความถูกต้องของข้อมูลเรื่องโรคติดต่อทางเพศสัมพันธ์และวิธีป้องกัน ที่ได้ก่อนนำมาใช้หรือเผยแพร่ต่อ |  |  |  |  |  |
| 5. ท่านสามารถตรวจสอบได้ว่าข้อมูลที่ท่านนำมาใช้มีความสมเหตุสมผล |  |  |  |  |  |
| **ความสามารถในการเข้าใจข้อมูล**  **เรื่องโรคติดต่อทางเพศสัมพันธ์และวิธีป้องกัน** | **คะแนน** | | | | |
| **1** | **2** | **3** | **4** | **5** |
| 6. ท่านสามารถอ่านและรับฟังความรู้เกี่ยวกับโรคติดต่อทางเพศสัมพันธ์  วิธีการป้องกันได้อย่างถูกต้อง |  |  |  |  |  |
| 7. ท่านสามารถจดจำข้อมูลเกี่ยวกับโรคติดต่อทางเพศสัมพันธ์และวิธีการป้องกันได้อย่างชัดเจน |  |  |  |  |  |
| 8. ท่านสามารถอธิบายเรื่องโรคติดต่อทางเพศสัมพันธ์และวิธีป้องกัน ได้  อย่างถูกต้อง |  |  |  |  |  |
| 9. ท่านสามารถตรวจสอบความเข้าใจเรื่องโรคติดต่อทางเพศสัมพันธ์และวิธีป้องกันได้ |  |  |  |  |  |
| 10.ท่านเข้าใจเรื่องโรคติดต่อทางเพศสัมพันธ์และวิธีป้องกันที่ได้รับ โดยไม่มีข้อสงสัย |  |  |  |  |  |
| **ความสามารถในการแลกเปลี่ยนข้อมูล**  **เรื่องโรคติดต่อทางเพศสัมพันธ์และวิธีป้องกัน** | **คะแนน** | | | | |
| **1** | **2** | **3** | **4** | **5** |
| 11. เมื่อท่านสงสัยเรื่องโรคติดต่อทางเพศสัมพันธ์และวิธีป้องกันท่านจะสามารถเข้ารับคำปรึกษากับบุคลากรทางการแพทย์ |  |  |  |  |  |
| 12. ท่านสามารถเตรียมคำถามโดยคิดและเขียนไว้ล่วงหน้าก่อนไปพบบุคคลากรทางการแพทย์ |  |  |  |  |  |
| 13.ท่านสามารถซักถามบุคคลากรทางการแพทย์ เรื่องโรคติดต่อทาง  เพศสัมพันธ์และวิธีป้องกันจนคลายข้อสงสัย |  |  |  |  |  |
| 14. ท่านสามารถประเมินคำถามของท่านได้ว่า ดีแล้วหรือจะต้องมีการ  ปรับปรุง |  |  |  |  |  |
| 15.ท่านสามารถปรับปรุงข้อคำถามและวิธีการถามบุคลากรให้ดีขึ้น |  |  |  |  |  |
| **ความสามารถในการตัดสินใจ** | **คะแนน** | | | | |
| **1** | **2** | **3** | **4** | **5** |
| 16. เมื่อแฟนของท่านชวนไปเที่ยวสองต่อสองท่านจะตัดสินใจปฏิเสธ |  |  |  |  |  |
| 17. เมื่อเพื่อนชวนให้ท่านดูคลิปโป๊ ท่านจะปฏิเสธคำชวนของเพื่อนและให้เหตุผล |  |  |  |  |  |
| 18. เมื่อท่านต้องมีเพศสัมพันธ์ท่านจะสวมถุงยางอนามัยทุกครั้ง |  |  |  |  |  |
| 19. เมื่อท่านมีอารมณ์ทางเพศ ท่านจะหากิจกรรมเพื่อเบี่ยงเบนความ  สนใจทางเพศ |  |  |  |  |  |
| 20. หากไม่มีถุงยางอนามัย ท่านจะปฏิเสธการมีเพศสัมพันธ์ทันที |  |  |  |  |  |
| **ความสามารถในการปฏิบัติตนเกี่ยวกับ(การนำไปใช้)** | **คะแนน** | | | | |
| **1** | **2** | **3** | **4** | **5** |
| 21. เมื่อเพื่อนของท่านชวนไปทำการบ้าน ที่บ้านสองต่อสอง ท่านจะ  ยอมรับคำชวนเสมอ |  |  |  |  |  |
| 22. เมื่อท่านมีแฟน ท่านจะไม่พาแฟนไปในที่ลับตาคนเพียงสองต่อสอง |  |  |  |  |  |
| 23. เมื่อท่านมีโอกาสในการล่วงเกินแฟน ท่านจะปฏิบัติทันที |  |  |  |  |  |
| 24. เมื่อนักเรียนเห็นคลิปโป๊ ในสื่อออนไลน์ท่านจะปิดสื่อนั้นทันที่ |  |  |  |  |  |
| 25. ท่านจะรีบตักเตือนเพื่อนทันที เมื่อเพื่อนของท่านมีพฤติกรรมเสี่ยง  ทางเพศ |  |  |  |  |  |

นักเรียนมีปัญหาหรือข้อมูลต่างๆที่เกี่ยวกับสุขภาพวัยรุ่น หรือความช่วยเหลือหรือกิจกรรมต่างๆเกี่ยวกับสุขภาพวัยรุ่นที่อยากจะเล่าให้พี่ (ผู้วิจัย) ฟัง

..........................................................................................................................................................................

..........................................................................................................................................................................

..........................................................................................................................................................................

..........................................................................................................................................................................

..........................................................................................................................................................................

..........................................................................................................................................................................

☺*ขอบคุณที่มีส่วนร่วมในการตอบแบบสอบถามครั้งนี้*☺
