# Supplementary material
Source: Research Square preprint supplement (doi:10.21203/rs.3.rs-8197895/v1)
Supplement: Supplementary file 2 [file 7336ab25dadcaeaf0ca195b1.docx]

**Questionnaire for research**

**The development of adolescents' health peer-support and supportive skills to promote the refer system via application among the hill tribe junior high school students in Chiang Rai Province**

**Section 1: Physical Health**

...............................................................**.......................................................................................**

Part 1 Sociodemographic characteristics

Part 2 knowledge about sexually transmitted diseases and prevention

Part 3 attitudes regarding sexually transmitted diseases prevention

Part 4 Interpersonal factors including sexual influence of peers, perceived family relationships, teacher’s role in teenage sexual health

Part 5 perceptions of school policy related to teenage sexual health

Part 6 Sexual Health Literacy

**Part 1 Sociodemographic characteristics**

Instructions: Mark “✓” in the box that best describes the student’s answer.

1. Age ……………………... years

2. Sex □ Male □ Female

3. Tribe

□ Akha □ Lahu □ Hmong □ Yao □ Karen □ Lisu

4. 13-digit Thai national ID card

□ Yes □ No □ 3. Other (specific) ………

5. Religion

□ Buddhist □ Christianity □ Islam □ Animist □ Other (specific) ………

6. Students are studying in class □Grade 1 □ Grade 2 □ Grade 3

7. School characteristics □ Day school □Boarding school

8. Family characteristics of the students (select one answer)

□ Father and mother live together

□My parents live apart but have not remarried (divorced).

□ Father or mother remarries

□Foster family

□ Father or mother died

9. How much has the student's history of drug use been practiced?

| History of drug use | Never | I used to, but I quit (at least 6 months ago). | Occasionally (1-2 times per week) | Frequently (3-4 times per week) | practiced daily |
| --- | --- | --- | --- | --- | --- |
| Smoking/e-cigarettes |  |  |  |  |  |
| Alcoholic beverages such as liquor, beer |  |  |  |  |  |
| Cannabis |  |  |  |  |  |
| Methamphetamine |  |  |  |  |  |
| Kratom |  |  |  |  |  |
| Other (specific) ……… |  |  |  |  |  |

**Part 2 knowledge about sexually transmitted diseases and prevention**

Instructions: Mark “✓” in the box that best describes the student’s answer.

| **Questions** | **Yes** | **No** |
| --- | --- | --- |
| 1. People at risk of contracting sexually transmitted diseases are people of all ages and genders who engage in risky sexual behavior. |  |  |
| 2. Having more than one sexual partner in the past 3 months increases the risk of contracting sexually transmitted diseases. |  |  |
| 3. Sexually transmitted diseases such as AIDS/syphilis can be transmitted to the fetus. |  |  |
| 4. Having sex with a close friend does not cause sexually transmitted diseases. |  |  |
| 5. People with sexually transmitted diseases, even if they do not show symptoms of the disease, can still spread the disease to others if they have sex without using a condom. |  |  |
| 6. Having intercourse with external ejaculation does not transmit sexually transmitted infections |  |  |
| 7. Painful urination and the presence of pus discharge from the urethra are symptoms of gonorrhea. |  |  |
| 8. Condoms should be worn only when the penis begins to become erect. |  |  |
| 9. Using condoms before sex can prevent STDs 100%. |  |  |
| 10. If you have risky sexual behavior or suspect that you have an STD, you should see a doctor immediately for examination or treatment. |  |  |

**Part 3 Attitudes regarding sexually transmitted diseases prevention**

Instructions: Mark “✓” in the box that best describes the student’s answer.

Strongly agree= 5 points Agree= 4 points

Not sure = 3 points Disagree= 2 points

Strongly disagree= 1 point

| **Questions** | **attitude** | | | | |
| --- | --- | --- | --- | --- | --- |
| Strongly disagree | Disagree | Not sure | Agree | Strongly agree |
| 1. Teens are at risk for STDs |  |  |  |  |  |
| 2. Having multiple sexual partners in teenage boys is something to be proud |  |  |  |  |  |
| 3. Oral sex is a way to prevent STDs |  |  |  |  |  |
| 4. Having multiple partners is considered cool among friends |  |  |  |  |  |
| 5. Online dating apps are a risk factor for STDs |  |  |  |  |  |
| 6. Choosing to masturbate is a way to prevent sexually transmitted diseases. |  |  |  |  |  |
| 7. Taking emergency contraception pills can help prevent sexually transmitted diseases. |  |  |  |  |  |
| 8. Having sex with your partner is a test of true love. |  |  |  |  |  |
| 9. Having sex without a condom shows true love. |  |  |  |  |  |
| 10.STDs can cause social stigma and discrimination. |  |  |  |  |  |

**Part 4 Interpersonal factors including sexual influence of peers, perceived family relationships, teacher’s role in teenage sexual health**

**4.1** sexual influence of peers

Instructions: Please read each statement carefully and mark ✓ in the space provided that corresponds to your level of compliance with the statement.

Very easy to do = 5 points Fairly easy to do= 4 points.

Fairly difficult to do= 3 points Very difficult to do= 2 points.

Not possible to do at all= 1 point.

| **Questions** | **score** | | | | |
| --- | --- | --- | --- | --- | --- |
| **1** | **2** | **3** | **4** | **5** |
| 1. When you have sexual problems, you will choose to consult your friends first every time. |  |  |  |  |  |
| 2. You talk to your friends about sexually transmitted diseases and how to prevent them. |  |  |  |  |  |
| 3. You give advice about sexually transmitted diseases and how to prevent them to your friends. |  |  |  |  |  |
| 4. You will warn them when you find that your friends in the group have risky sexual behavior. |  |  |  |  |  |
| 5. You and your friends will find activities to do to divert your attention from sex. |  |  |  |  |  |

**4.2 perceived family relationships**

| **Questions** | **score** | | | | |
| --- | --- | --- | --- | --- | --- |
| **1** | **2** | **3** | **4** | **5** |
| 1. When you have a boyfriend, you will tell your parents every time. |  |  |  |  |  |
| 2. If you have a sexual problem, you will consult your parents first. |  |  |  |  |  |
| 3. When you ask your parents about sex, you will always get good advice. |  |  |  |  |  |
| 4. Your parents are good role models in sexual role play. |  |  |  |  |  |
| 5. When you watch a TV program and there is inappropriate sexual play, your parents will always give you advice. |  |  |  |  |  |

**4.3** teacher’s role in teenage sexual health

| **Questions** | **score** | | | | |
| --- | --- | --- | --- | --- | --- |
| **1** | **2** | **3** | **4** | **5** |
| 1. Your teacher has taught about STDs and prevention methods. |  |  |  |  |  |
| 2. Your teacher has used media or equipment to teach about STDs and prevention methods to make it easy to understand. |  |  |  |  |  |
| 3. Your teacher has taught appropriate behavior skills with the opposite sex. |  |  |  |  |  |
| 4. When you consult your teacher about STDs and prevention methods, you will receive explanations with a willing attitude. |  |  |  |  |  |
| 5. When you or your friends have sexual problems, your teacher will always rush to help. |  |  |  |  |  |

**Part 5 perceptions of school policy related to teenage sexual health**

Instructions: Please read each statement carefully and mark ✓ in the space provided that corresponds to your level of compliance with the statement.

Very easy to do = 5 points Fairly easy to do= 4 points.

Fairly difficult to do= 3 points Very difficult to do= 2 points.

Not possible to do at all= 1 point.

| **Questions** | **score** | | | | |
| --- | --- | --- | --- | --- | --- |
| **1** | **2** | **3** | **4** | **5** |
| 1. Your school has a policy to promote knowledge about sexually transmitted diseases and prevention methods. |  |  |  |  |  |
| 2. Your school monitors and prevents risky sexual behavior among students. |  |  |  |  |  |
| 3. Your school teaches about sexually transmitted diseases and prevention methods. |  |  |  |  |  |
| 4. Your school has media/exhibitions/boards on knowledge about sexually transmitted diseases and prevention methods. |  |  |  |  |  |
| 5. Your school provides training on knowledge about sexually transmitted diseases and prevention methods from external agencies. |  |  |  |  |  |

Part 6 Sexual Health Literacy

Instructions: Please read each statement carefully and mark ✓ in the space provided that corresponds to your level of compliance with the statement.

Very easy to do = 5 points Fairly easy to do= 4 points.

Fairly difficult to do= 3 points Very difficult to do= 2 points.

Not possible to do at all= 1 point.

| **Ability and skills to access information**  **about sexually transmitted diseases and prevention methods** | **score** | | | | |
| --- | --- | --- | --- | --- | --- |
| **1** | **2** | **3** | **4** | **5** |
| 1. You can search for information about sexually transmitted diseases and prevention methods from various media by yourself. |  |  |  |  |  |
| 2. When you are looking for information about STDs and how to prevent them, you can consider the credibility of the information by looking at the name of the organization or the author who is recognized. |  |  |  |  |  |
| 3. When you are looking for information on sexually transmitted diseases and prevention methods, you can check the currentness of the information by looking at the date and month listed each time. |  |  |  |  |  |
| 4. You can verify the accuracy of the information on sexually transmitted diseases and prevention methods you receive before using or disseminating it. |  |  |  |  |  |
| 5. You can check that the information you use is reasonable. |  |  |  |  |  |
| **Ability to understand information about sexually transmitted diseases and how to prevent** | **score** | | | | |
| **1** | **2** | **3** | **4** | **5** |
| 6. You can read and listen to knowledge about sexually transmitted diseases and how to prevent them correctly. |  |  |  |  |  |
| 7. You can clearly remember information about sexually transmitted diseases and how to prevent them. |  |  |  |  |  |
| 8. You can explain about STDs and how to prevent them correctly. |  |  |  |  |  |
| 9. You can check your understanding of sexually transmitted diseases and how to prevent them. |  |  |  |  |  |
| 10. You understand about STDs and the methods of protection available, without a doubt. |  |  |  |  |  |
| **Ability to exchange information (communication and asking a question) about sexually transmitted diseases and prevention** | **score** | | | | |
| **1** | **2** | **3** | **4** | **5** |
| 11. When you have questions about sexually transmitted diseases and how to prevent them, you can consult a medical professional. |  |  |  |  |  |
| 12. When you have questions about sexually transmitted diseases and how to prevent them, you can consult a medical professional. |  |  |  |  |  |
| 13. When you have questions about sexually transmitted diseases and how to prevent them, you can consult a medical professional. |  |  |  |  |  |
| 14. You can evaluate your question whether it is good or needs to be improved. |  |  |  |  |  |
| 15. You can improve your questions and how you ask staff. |  |  |  |  |  |
| **Decision making ability** | **score** | | | | |
| **1** | **2** | **3** | **4** | **5** |
| 16. When your girlfriend invites you to go out together, you decide to decline. |  |  |  |  |  |
| 17. When your friends invite you to watch porn, you will reject their invitation and give a reason. |  |  |  |  |  |
| 18. Whenever you have sex, you should always wear a condom. |  |  |  |  |  |
| 19. When you are sexually aroused, you will seek out activities to divert your sexual interest. |  |  |  |  |  |
| 20. If there is no condom, you will immediately refuse to have sex. |  |  |  |  |  |
| **Ability to act on (application)** | **score** | | | | |
| **1** | **2** | **3** | **4** | **5** |
| 21. When your friend invites you to do homework at home alone, you will always accept the invitation. |  |  |  |  |  |
| 22. When you have a lover, you will not take them to a secluded place alone with others. |  |  |  |  |  |
| 23. When you have the opportunity to offend your girlfriend, you will do it immediately. |  |  |  |  |  |
| 24. When students see pornographic clips on online media, you will immediately close that media. |  |  |  |  |  |
| 25. You will immediately warn your friends when they engage in sexual risk behavior. |  |  |  |  |  |

Students have any problems or information related to adolescent health, or assistance or activities related to adolescent health that they would like to tell the researcher.

............................................................................................................................................................

............................................................................................................................................................

............................................................................................................................................................

............................................................................................................................................................

............................................................................................................................................................

............................................................................................................................................................

☺ *Thank you for taking part in this survey.* ☺
